## ***Vibrio parahaemolyticus* T6SS2 effector repertoires**

Daniel Tchelet<sup>a</sup>, Kinga Keppel<sup>a</sup>, Eran Bosis<sup>b</sup>, & Dor Salomon<sup>a,#</sup>

<sup>a</sup> Department of Clinical Microbiology and Immunology, Sackler Faculty of Medicine, Tel Aviv University, Tel Aviv, Israel

<sup>b</sup> Department of Biotechnology Engineering, Braude College of Engineering, Karmiel, Israel

# Address correspondence to Dor Salomon, [dorsalomon@mail.tau.ac.il](mailto:dorsalomon@mail.tau.ac.il)

### **Abstract**

All strains of the marine bacterium *Vibrio parahaemolyticus* harbor a type VI secretion system (T6SS) named T6SS2, suggesting that this system plays an important role in the life cycle of this emerging pathogen. Although T6SS2 was recently shown to play a role in interbacterial competition, its effector repertoire remains unknown. Here, we employed proteomics to investigate the T6SS2 secretome of two *V. parahaemolyticus* strains, and we identified several antibacterial effectors encoded outside of the main T6SS2 gene cluster. We revealed two T6SS2-secreted proteins that are conserved in this species, indicating that they constitute the core secretome of T6SS2; other identified effectors are found only in subsets of strains, suggesting that they comprise an accessory effector arsenal of T6SS2. Remarkably, a conserved Rhs repeat-containing effector serves as a quality control checkpoint and is required for T6SS2 activity. Our results reveal the effector repertoire of a conserved T6SS, some of which have no known activity and have not been previously associated with T6SSs.

**Keywords:** *Vibrio*, effector, competition, antibacterial, secretion, type VI secretion system

## 26 Introduction

27 Members of the *Vibrionaceae* family are aquatic, Gram-negative bacteria (1). Many *Vibrio*  
28 species are pathogens of humans and marine animals (2–4). New pathogenic strains emerge  
29 due to the natural competency of these bacteria and due to horizontal gene transfer, enabling  
30 the acquisition of new virulence traits (5, 6).

31 In the marine environment, vibrios are in constant competition with rival bacteria over resources  
32 (7, 8). They also interact with protists that either prey on them or that serve as a replicative  
33 niche (9–11). Interactions with both bacteria and eukaryotes can be mediated by the type VI  
34 secretion system (T6SS), which is employed by many vibrios (12). T6SS is a molecular  
35 nanomachine that delivers toxic proteins, called effectors, into neighboring cells (13, 14). A  
36 missile-like structure, comprising an inner tube composed of stacked hexameric rings of Hcp  
37 proteins capped by a spike consisting of a VgrG protein trimer sharpened by a PAAR repeat-  
38 containing protein, is propelled out of the cell and into an adjacent cell by a contractile sheath  
39 that engulfs it (15, 16). The tube-spike complex is decorated with two types of effectors: (1)  
40 specialized effectors, which are the structural components Hcp, VgrG, or PAAR containing a C-  
41 terminal toxin domain extension; and (2) cargo effectors, which are proteins that non-covalently  
42 bind to a structural protein (17), either directly or aided by an adaptor protein (18), a tether (19),  
43 or a co-effector (20). Most T6SSs investigated to date deliver effectors with antibacterial  
44 activities and have therefore been implicated in interbacterial competitions (7, 21–24). However,  
45 several *Vibrio* T6SSs have also been shown to deliver effectors that target eukaryotic cells,  
46 indicating that they also mediate interactions with eukaryotes (13, 23, 25, 26). Notably,  
47 antibacterial effectors are encoded in bi-cistronic units together with cognate immunity proteins  
48 that antagonize their toxic activity to prevent self or kin-intoxication (14, 27).

49 *Vibrio parahaemolyticus* is a leading cause of gastroenteritis caused from consuming  
50 undercooked or raw seafood (3). It is also the major cause of acute hepatopancreatic necrosis  
51 disease (AHPND) in shrimp (28). The molecular determinant that governs *V. parahaemolyticus*  
52 virulence against humans has been identified as a type III secretion system (29, 30); the  
53 virulence determinant against shrimp was identified as the PirA/B toxin (31). *V.*  
54 *parahaemolyticus* also harbors T6SSs (32). T6SS1, which is found in most but not in all strains  
55 (32), mediates antibacterial toxicity during interbacterial competition by delivering effector  
56 repertoires that differ between strains (32–35). T6SS1 was investigated in several strains and  
57 was shown to be active under warm marine-like conditions (i.e., 3% [wt/vol] NaCl at 30°C) upon  
58 surface sensing activation (21). We recently showed that all *V. parahaemolyticus* strains harbor  
59 a conserved T6SS, named T6SS2, suggesting that this system plays an important role in the life  
60 cycle of this pathogen (32). Although recent reports indicated that T6SS2 mediates antibacterial  
61 activities (35, 36), its effector repertoire remains unknown.

62 In this work, we investigated T6SS2 in two *V. parahaemolyticus* strains: the reference clinical  
63 strain RIMD 2210633 (37) and the environmental strain BB22OP (38). We showed that T6SS2  
64 in both strains plays a role in interbacterial competition. Using comparative proteomics, followed  
65 by experimental validations, we revealed the effector repertoire of T6SS2 in both strains. We  
66 found that *V. parahaemolyticus* T6SS2 employs a conserved Rhs repeat-containing effector that  
67 is essential for its activity, as well as accessory effectors that differ between strains.

68

## 69 Results

### 70 Identifying the T6SS2 secretome in *V. parahaemolyticus* BB22OP

71 We previously showed that T6SS2 in *V. parahaemolyticus* BB22OP plays a role in interbacterial  
 72 competition under warm, marine-like conditions (i.e., 3% [wt/vol] NaCl at 30°C) (35), suggesting  
 73 that this system delivers antibacterial effectors. To reveal the secretome of this T6SS2 and to  
 74 identify its effectors, we used mass spectrometry analysis and compared the proteins secreted  
 75 by a wild-type strain with those secreted by a strain in which we inactivated T6SS2 (T6SS2<sup>-</sup>;  
 76  $\Delta hcp2$ ). We identified eight proteins that were significantly enriched in the secretome of the wild-  
 77 type (T6SS2<sup>+</sup>) strain (Fig. 1A, Table 1, and Supplementary Dataset S1). These proteins  
 78 include the three secreted structural components of the T6SS tube-spike complex, Hcp2,  
 79 VgrG2, and PAAR2 (16), as well as five additional proteins. These additional proteins are  
 80 predicted to be antibacterial effectors, since they are encoded next to predicted cognate  
 81 immunity proteins (Fig. 1B): Two have a predicted Lipase\_3 domain (WP\_015313641.1 /  
 82 T2LipA<sup>BB22</sup> and WP\_015296300.1 / T2LipB<sup>BB22</sup>; they are 36.6% identical across the entire  
 83 sequence), one has a membrane-disrupting Tme domain (WP\_015296823.1 / T2Tme<sup>BB22</sup>) (35),  
 84 one has Rhs repeats fused to a PoNe DNase (WP\_015296737.1 / T2Rhs-Nuc<sup>BB22</sup>) (34, 39), and  
 85 one has no known domain (WP\_015313171.1 / T2Unkwn<sup>BB22</sup>). We could not predict the activity  
 86 of the latter using sequence (BLAST (40) and HHpred (41)) and structure (AlphaFold2 structure  
 87 prediction (42, 43) followed by DALI server (44)) analyses. Notably, all five putative effectors are  
 88 encoded outside of the main T6SS2 gene cluster.

89

90 **Table 1. Predicted effectors secreted by *V. parahaemolyticus* T6SS2.**

| <i>V. parahaemolyticus</i> strain | Predicted effector name   | Protein accession number    | Locus        | Known/predicted activity or domain *^# |
|-----------------------------------|---------------------------|-----------------------------|--------------|----------------------------------------|
| BB22OP                            | T2Rhs-Nuc <sup>BB22</sup> | WP_015296737.1              | VPBB_RS07235 | Rhs repeats + PoNe *                   |
|                                   | T2Tme <sup>BB22</sup>     | WP_015296823.1              | VPBB_RS07950 | Tme ^                                  |
|                                   | T2Unkwn <sup>BB22</sup>   | WP_015313171.1              | VPBB_RS18835 | Unknown                                |
|                                   | T2LipA <sup>BB22</sup>    | WP_015313641.1              | VPBB_RS22630 | Lipase_3 *                             |
|                                   | T2LipB <sup>BB22</sup>    | WP_015296300.1              | VPBB_RS03020 | Lipase_3 *                             |
| RIMD 2210633                      | T2Rhs-Nuc <sup>RIMD</sup> | BAC59780.1 / WP_005479434.1 | VP1517       | Rhs repeats + HNH nuclease *           |
|                                   | T2Hydro <sup>RIMD</sup>   | BAC61690.1                  | VPA0347      | $\alpha/\beta$ hydrolase #             |
|                                   | T2LipB <sup>RIMD</sup>    | BAC58889.1 / WP_005483054.1 | VP0626       | Lipase_3 *                             |

91 \* Predicted by the NCBI conserved Domain Database; ^ predicted by sequence homology; #  
 92 predicted by HHpred.

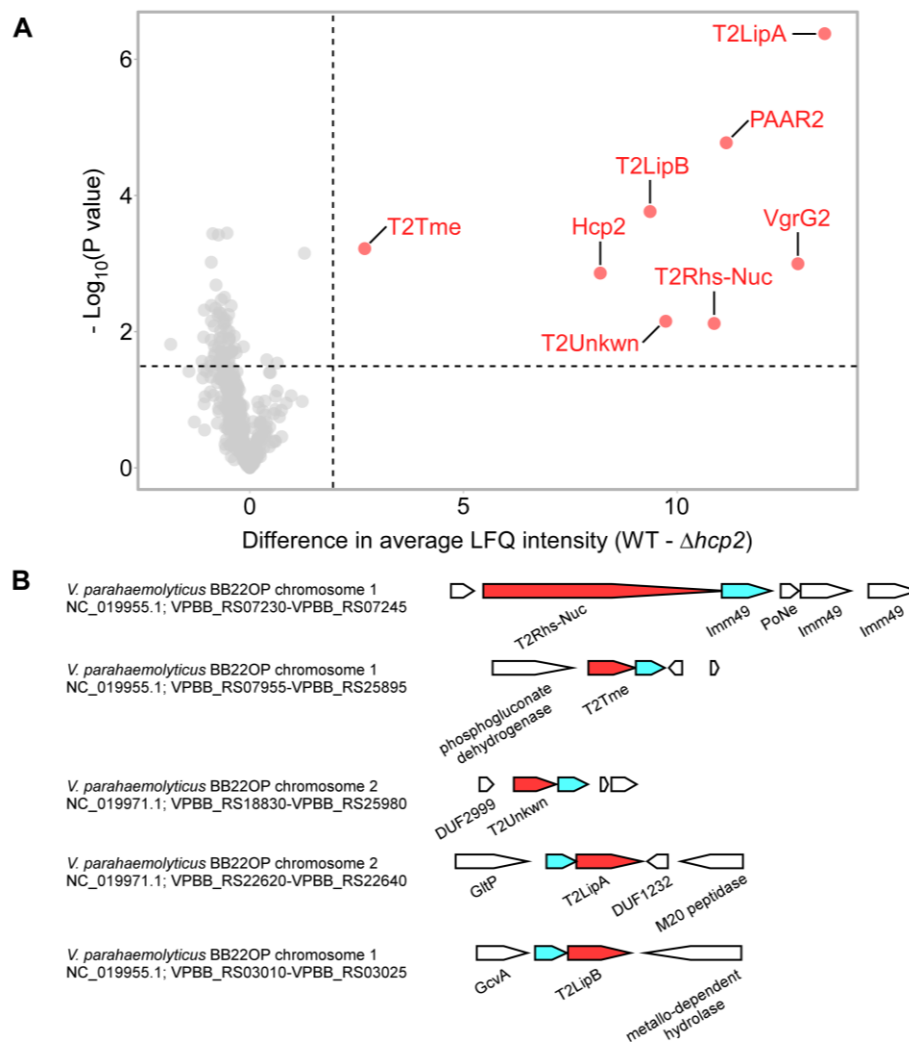

**Fig. 1. The T6SS2 secretome of *V. parahaemolyticus* strain BB22OP. (A)** A volcano plot summarizing the comparative proteomics of proteins identified in the medium of wild type (WT) and T6SS2<sup>-</sup> ( $\Delta hcp2$ ) *V. parahaemolyticus* BB22OP strains using label-free quantification. The average difference in signal intensities between the WT strain and the  $\Delta hcp2$  strain is plotted against the  $-\text{Log}_{10}$  of Student's *t*-test P values ( $n = 3$  biological replicates). Proteins that were significantly more abundant in the secretome of the WT strain (difference in the average LFQ intensities  $> 2$ ; P value  $< 0.03$ ; with a minimum of 5 Razor unique peptides) are denoted in red and annotated. **(B)** Schematic representation of genome neighborhoods for non-structural T6SS2-secreted proteins identified in (A). Predicted secreted effectors are denoted in red; predicted neighboring immunity genes are denoted in cyan. Arrows indicate the direction of transcription, and the names of encoded proteins or domains are denoted below. The RefSeq GenBank accession number and the locus tag range are provided.

## 94 Identifying the T6SS2 secretome in *V. parahaemolyticus* RIMD 2210633

95 Next, we wanted to determine whether the T6SS2 secretome differs between *V.*  
96 *parahaemolyticus* strains. We previously reported that T6SS2 in *V. parahaemolyticus* RIMD  
97 2210633 is inactive under warm, marine-like conditions (21). However, Metzger et al. recently  
98 found that T6SS2 in this strain plays a role in interbacterial competition when bacteria are grown  
99 in low salt concentrations (i.e., in LB media) and upon the over-expression of TfoX, a regulator  
100 of T6SS and competence in vibrios (36). This observation suggests that the effectors secreted  
101 by this strain are also antibacterial. To confirm this report, we monitored the effect of TfoX over-  
102 expression on T6SS2 activity in strain RIMD 2210633. Indeed, we found that upon the  
103 arabinose-inducible expression of TfoX, T6SS2 in strain RIMD 2210633 was induced, as  
104 manifested by the elevated expression and secretion of Hcp2, a hallmark secreted component  
105 of the system (13)(16) (**Fig. 2A**). This activation was independent of surface sensing, which was  
106 induced by the addition of phenamil, an inhibitor of the polar flagella motor (21). Moreover, we  
107 confirmed that the over-expression of TfoX increased the antibacterial activity of T6SS2,  
108 compared to a strain harboring an empty plasmid, as manifested by the reduced viability of *V.*  
109 *natriegens* prey cells during competition on solid agar plates (**Fig. 2B**). Inactivation of T6SS2 by  
110 deleting *hcp2* abolished the killing of *V. natriegens* prey, indicating that the TfoX-induced killing  
111 was mediated by T6SS2. Notably, since T6SS1 also contributed to bacterial killing under the  
112 assay conditions (**Supplementary Fig. S1**), we used a T6SS1<sup>-</sup> ( $\Delta hcp1$ ) parental strain for these  
113 competition assays.

114 To reveal the secretome of the RIMD 2210633 T6SS2, we employed the comparative  
115 proteomics approach described above for strain BB22OP. To this end, we compared the  
116 proteins secreted by a strain with a functional T6SS2 (T6SS2<sup>+</sup>;  $\Delta hcp1$ ) with those secreted by a  
117 strain in which we inactivated T6SS2 (T6SS2<sup>-</sup>;  $\Delta hcp1\Delta hcp2$ ); notably, TfoX was over-expressed  
118 in these strains to induce T6SS2. We identified six proteins that were significantly enriched in  
119 the secretome of the T6SS2<sup>+</sup> (**Fig. 2C**, **Table 1**, and **Supplementary Dataset S2**). These  
120 proteins include two of the secreted structural components of the T6SS tube-spike complex,  
121 Hcp2 and VgrG2 (13), as well as four additional proteins. Three of the additional proteins are  
122 predicted to be antibacterial effectors, since they are encoded next to a predicted cognate  
123 immunity protein. These include two that are orthologs of proteins identified in the T6SS2  
124 secretome of strain BB22OP and are encoded in the same synteny (i.e., T2Rhs-Nuc<sup>RIMD</sup> /  
125 BAC59780.1 and T2LipB<sup>RIMD</sup> / BAC58889.1), and another that has a predicted  $\alpha/\beta$ -hydrolase  
126 domain (i.e., T2Hydro<sup>RIMD</sup> / BAC61690.1) (**Fig. 1D**). All three proteins are encoded outside of the  
127 T6SS2 gene cluster. The fourth protein, VP2395 (BAC60658.1 / WP\_005456695.1), is a  
128 predicted cellulase; it is encoded next to genes encoding proteins involved in sugar metabolism.  
129 Since *vp2395* does not neighbor a gene that is likely to encode a cognate immunity protein, and  
130 given its genomic neighborhood, we did not predict that VP2395 is an antibacterial effector and  
131 we therefore omitted it from subsequent analyses. Taken together, these results indicate that  
132 the T2Rhs-Nuc orthologs and the T2LipB orthologs are secreted by T6SS2 of both strains,  
133 whereas each strain has an additional, different set of proteins secreted by T6SS2.

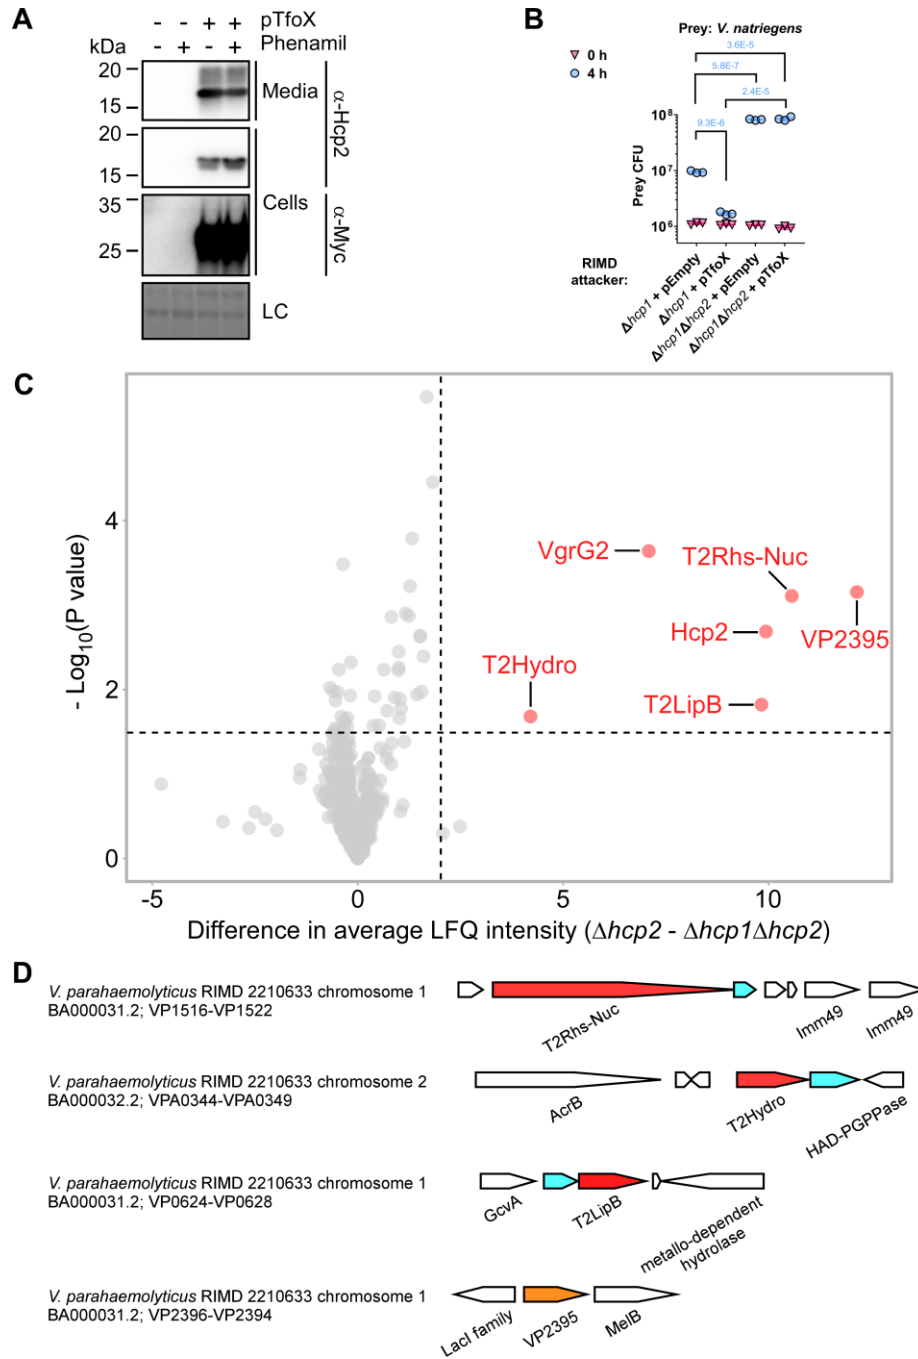

**Fig. 2. The T6SS2 secretome of *V. parahaemolyticus* strain RIMD 2210633.** (A) Expression (cells) and secretion (media) of Hcp2 from the *V. parahaemolyticus* RIMD 2210633 strain containing an empty plasmid (pTfoX -) or a plasmid for the arabinose-inducible expression of a C-terminal Myc-His tagged TfoX (pTfoX +). Samples were grown in LB media supplemented with kanamycin to maintain the plasmids, and in the presence (+) or absence (-) of phenamil at 30°C. Loading control (LC) is shown for total protein lysates. (B) Viability counts (colony forming units [CFU]) of *V. natriegens* prey strain before (0 h) and after (4 h) co-incubation with the indicated *V. parahaemolyticus* RIMD 2210633 attacker strain carrying an empty plasmid (pEmpty) or a plasmid for the arabinose-inducible expression of TfoX (pTfoX) on LB agar plates supplemented with 0.1% (wt/vol) L-arabinose to induce expression from plasmids. The statistical significance between samples at the 4 h time point was calculated using an unpaired, two-tailed Student's *t*-test. Data are shown as the mean  $\pm$  SD; *n* = 3. (C) A volcano plot summarizing the comparative proteomics of proteins identified in the medium of the T6SS2<sup>+</sup> ( $\Delta hcp1$ ) and T6SS2<sup>-</sup> ( $\Delta hcp1\Delta hcp2$ ) *V. parahaemolyticus* RIMD 2210633 strains, expressing TfoX from a plasmid, using label-free quantification. The average difference in the signal intensities between the WT strain and the  $\Delta hcp2$  strain is plotted against the -Log<sub>10</sub> of Student's *t*-test P values (*n* = 3 biological replicates). Proteins that were significantly more abundant in the secretome of the WT strain (difference in the average LFQ intensities > 2; P value < 0.03; with a minimum of 5 Razor unique peptides) are denoted in red and annotated. (D) Schematic representation of genome neighborhoods for non-structural T6SS2-secreted proteins identified in (C). Predicted secreted effectors are denoted in red; predicted neighboring immunity genes are denoted in cyan; *vp2395*, which is not predicted to be an effector, is denoted in orange. Arrows indicate the direction of transcription, and the names of encoded proteins or domains are denoted below. The RefSeq GenBank accession number and the locus tag range are provided.

135

### 136 Validating T6SS2 effector and immunity pairs

137 After identifying the T6SS2 secretome in two *V. parahaemolyticus* strains, we set out to  
138 determine whether the T6SS2-secreted proteins that we identified in our comparative proteomic  
139 analyses are antibacterial T6SS effectors, and whether their downstream- or upstream-encoded  
140 proteins serve as cognate immunity proteins. To this end, we generated strains in which we  
141 deleted the genes encoding the predicted effectors together with their predicted adjacent  
142 immunity genes, and used them as prey strains in self-competition assays. Since the activity of  
143 T6SS2 in strain BB22OP was comparable in low (LB, 1% [wt/vol] NaCl) and high (MLB, 3%  
144 [wt/vol] NaCl) salt media (**Supplementary Fig. S2**), we used LB media for all subsequent  
145 competition assays for both BB22OP and the RIMD 2210633 strains.

146 As shown in **Fig. 3A-D**, deletion of the genes encoding the predicted *V. parahaemolyticus*  
147 BB22OP effectors T2Rhs-Nuc<sup>BB22</sup>, T2Tme<sup>BB22</sup>, T2Unkwn<sup>BB22</sup>, and T2LipA<sup>BB22</sup>, together with their  
148 neighboring predicted immunity genes (**Fig. 1B**), resulted in prey strains that were sensitive to  
149 an attack by their parental wild-type strain. The sensitivity was dependent on a functional T6SS2  
150 in the attacker strain and on the presence of the predicted effector, since deletion of either *hcp2*  
151 or the predicted effector alleviated this toxicity. Moreover, expression of the respective,  
152 predicted immunity protein from a plasmid in the sensitive prey strain protected it from this  
153 T6SS2-mediated attack. Taken together, these results confirm that T2Rhs-Nuc<sup>BB22</sup>, T2Tme<sup>BB22</sup>,  
154 T2Unkwn<sup>BB22</sup>, and T2LipA<sup>BB22</sup> are *bona fide* T6SS2 effectors, and that their neighboring genes  
155 encode for their cognate immunity proteins. Surprisingly, although T2LipB<sup>BB22</sup> and the protein  
156 encoded upstream are homologs of the confirmed effector and immunity pair, T2LipA<sup>BB22-i</sup>

157 (36.6% and 27.7% identity, respectively), their deletion did not render the prey strain sensitive to  
158 intoxication by a wild-type attacker (**Fig. 3E**). Therefore, we cannot confirm the role of  
159 T2LipB<sup>BB22</sup> as a T6SS2 antibacterial effector at this time.

160 Similarly, deletion of the predicted T6SS2 effectors of *V. parahaemolyticus* RIMD 2210633,  
161 T2Rhs-Nuc<sup>RIMD</sup> and T2Hydro<sup>RIMD</sup>, together with their downstream genes, rendered these prey  
162 strains sensitive to an attack by their parental attacker strain (**Fig. 4A-B**). Inactivation of T6SS2  
163 in the attacker strain by deleting *hcp2*, as well as deleting the predicted effector in the attacker  
164 strain, alleviated this toxicity. In addition, expression of the downstream gene, predicted to  
165 encode the cognate immunity protein, from a plasmid protected the sensitive prey strain from  
166 the T6SS2-mediated attack. Taken together, these results confirm that T2Rhs-Nuc<sup>RIMD</sup> and  
167 T2Hydro<sup>RIMD</sup>, together with their downstream genes, constitute *bona fide* T6SS2 effector and  
168 immunity pairs. Similar to their orthologs in strain BB22OP (i.e., T2LipB<sup>BB22</sup> and its predicted  
169 immunity; 98% and 99% identity, respectively), deletion of the genes encoding T2LipB<sup>RIMD</sup> and  
170 its predicted immunity protein in strain RIMD 2210633 did not render the prey strain sensitive to  
171 a T6SS2-mediated attack by its parental attacker strain (**Fig. 4C**). Therefore, the role of  
172 T2LipB<sup>RIMD</sup> as an antibacterial effector of T6SS2 remains unclear.

173

#### 174 **The start codon of T2Hydro<sup>RIMD</sup> is misannotated**

175 The newly identified T6SS2 effector in *V. parahaemolyticus* RIMD 2210633, T2Hydro<sup>RIMD</sup>, is  
176 annotated with different translational start sites in the two GenBank accessions available on  
177 NCBI. In the international nucleotide sequence database collaboration (INSDC) GenBank  
178 accession BA000032.2, the effector is annotated as being 467 amino acids long (protein  
179 accession number BAC61690.1); in the RefSeq GenBank accession NC\_004605.1, it is  
180 annotated as a 435 amino acid-long protein (protein accession number WP\_021451965.1), with  
181 a start site corresponding to methionine 33 in BAC61690.1. However, upon inspection of the  
182 protein coverage in our mass spectrometry results, we could not find peptides corresponding to  
183 amino acids 1-64 of BAC61690.1. The first amino acid that is covered by peptides identified in  
184 the mass spectrometry results corresponds to methionine 65 of BAC61690.1. Based on this  
185 observation, we hypothesized that the translation start site of T2Hydro<sup>RIMD</sup> is misannotated in  
186 both the INSDC and RefSeq GenBank accessions, and that the first amino acid of this effector  
187 corresponds to methionine 65 in BAC61690.1. This hypothesis was further supported by an  
188 analysis performed using the translation start site identification program, Prodigal (45). To  
189 determine whether T2Hydro<sup>RIMD</sup>, starting at methionine 65 (T2Hydro<sup>RIMD/M65</sup>), is a functional  
190 T6SS2 effector, we set out to test its ability to be delivered by T6SS2 and to mediate  
191 interbacterial competition. To this end, we introduced the genes encoding T2Hydro<sup>RIMD/M65</sup> and  
192 its downstream-encoded immunity protein into *V. parahaemolyticus* BB22OP. This strain serves  
193 as a surrogate T6SS2-containing attacker, since it has the same T6SS2 as the RIMD 2210633  
194 strain, yet it lacks a T2Hydro<sup>RIMD</sup> homolog. As shown in **Supplementary Fig. S3**, plasmid-  
195 expressed T2Hydro<sup>RIMD/M65</sup> and its cognate immunity protein enabled a BB22OP surrogate  
196 attacker to intoxicate its parental prey (lacking the cognate immunity). This toxicity was  
197 dependent on a functional T6SS2 in the surrogate attacker, since it was alleviated upon deletion  
198 of *hcp2*. Moreover, expression of the cognate immunity protein from a plasmid in the parental  
199 BB22OP prey strain protected it from the T2Hydro<sup>RIMD/M65</sup>-mediated attack. Taken together,  
200 these results suggest that the start site of T2Hydro<sup>RIMD</sup> corresponds to methionine 65 in  
201 BAC61690.1.



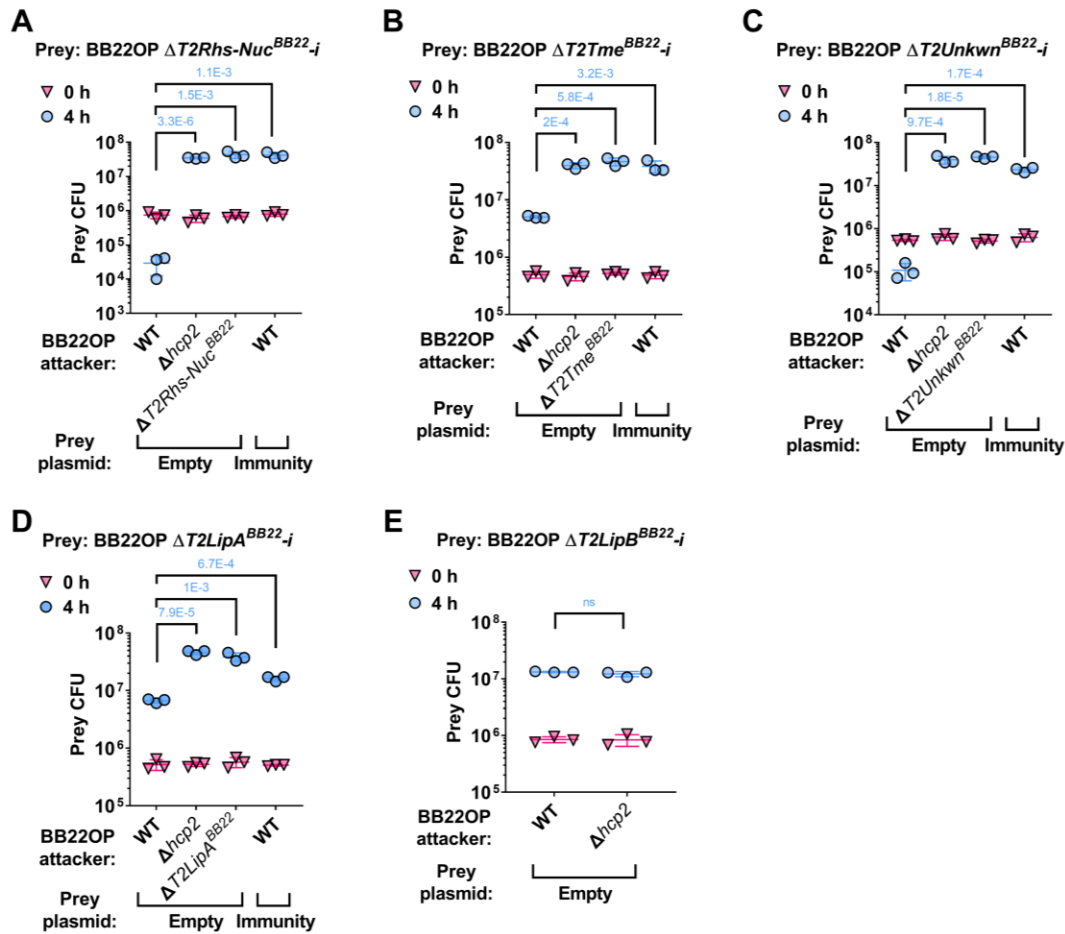

**Fig. 3. Validation of *V. parahaemolyticus* strain BB22OP T6SS2 effector and immunity pairs.** Viability counts (CFU) of the indicated BB22OP derivative prey strains containing a deletion of the predicted effectors T2Rhs-Nuc<sup>BB22</sup> (A), T2Tme<sup>BB22</sup> (B), T2Unkwn<sup>BB22</sup> (C), T2LipA<sup>BB22</sup> (D), and T2LipB<sup>BB22</sup> (E), and their neighboring predicted immunity gene (-i) before (0 h) and after (4 h) co-incubation with the indicated *V. parahaemolyticus* BB22OP attacker strains. Prey strains contain either an empty plasmid (Empty) or a plasmid for the arabinose-inducible expression of the predicted immunity protein that was deleted (Immunity). Competitions were performed on LB agar plates supplemented with L-arabinose (0.1% [wt/vol] in A, B, C, and E; 0.01% [wt/vol] in D) to maintain the plasmids and to induce protein expression, respectively. The statistical significance between samples at the 4 h time point was calculated using an unpaired, two-tailed Student's *t*-test; ns, no significant difference ( $P > 0.05$ ). Data are shown as the mean  $\pm$  SD;  $n = 3$ .

202

### 203 T2Rhs-Nuc is conserved and required for T6SS2 activity in *V. parahaemolyticus*

204 Next, we investigated whether the deletion of the effectors described above affected T6SS2  
 205 activity. To this end, we monitored the secretion of Hcp2, a hallmark T6SS-secreted protein, in  
 206 strains deleted for each of the predicted effectors. Surprisingly, deletion of T2Rhs-Nuc<sup>BB22</sup> and  
 207 T2Rhs-Nuc<sup>RIMD</sup> abolished Hcp2 secretion in their respective strains (Fig. 5A-B). These results  
 208 indicate that T2Rhs-Nuc is not only a T6SS2 effector—it is also required for T6SS2 activity.

209 Since the investigated T2Rhs-Nuc effectors are not encoded within the T6SS2 gene cluster  
 210 (Fig. 1B and Fig. 2D), the observation that they are essential for T6SS2 activity suggests that  
 211 T2Rhs-Nuc should be conserved in *V. parahaemolyticus* strains. Indeed, we identified T2Rhs-  
 212 Nuc orthologs in almost all of the complete *V. parahaemolyticus* genomes available on the NCBI  
 213 RefSeq database (found in 73 out of 75 genomes examined) (Fig. 5C and Supplementary  
 214 Dataset S3). This result is in agreement with the requirement of T2Rhs-Nuc for T6SS2 activity.  
 215 Further analysis of complete *V. parahaemolyticus* genomes revealed that, similar to T2Rhs-Nuc,  
 216 T2LipB homologs are ubiquitous in this species. In contrast, effectors identified in the T6SS2  
 217 secretome of only one of the strains that we investigated were encoded only by a subset of the  
 218 genomes; each genome harbored a different combination of T6SS2-secreted effectors (Fig. 5C  
 219 and Supplementary Dataset S1). Taken together, these results indicate that T2RhsNuc and  
 220 T2LipB constitute the “core” substrates secreted by *V. parahaemolyticus* T6SS2, whereas  
 221 T2LipA, T2Hydro, T2Tme, and T2Unkwn appear to belong to an accessory T6SS2 effector  
 222 repertoire.

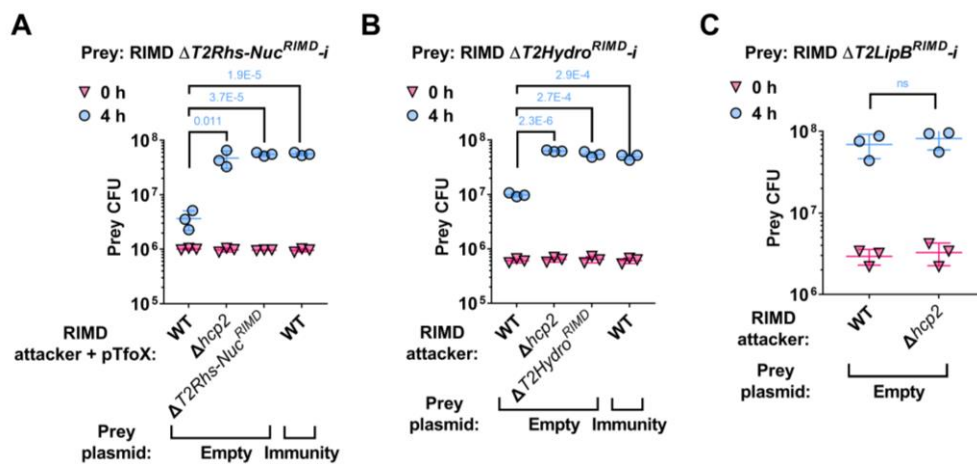

**Fig. 4. Validation of *V. parahaemolyticus* strain RIMD 2210633 T6SS2 effector and immunity pairs.** Viability counts (CFU) of the indicated RIMD 2210633 derivative prey strains containing a deletion of the predicted effectors T2Rhs-Nuc<sup>RIMD</sup> (A), T2Hydro<sup>RIMD</sup> (B), and T2LipB<sup>RIMD</sup> (C), and their neighboring predicted immunity gene (-i) before (0 h) and after (4 h) co-incubation with the indicated *V. parahaemolyticus* RIMD 2210633 attacker strains. Prey strains contain either an empty plasmid (Empty) or a plasmid for the arabinose-inducible expression of the predicted immunity protein that was deleted (Immunity). Competitions were performed on LB agar plates supplemented with 0.1% [wt/vol] L-arabinose to maintain the plasmids and to induce protein expression, respectively. The statistical significance between samples at the 4 h time point was calculated using an unpaired, two-tailed Student's *t*-test; ns, no significant difference ( $P > 0.05$ ). Data are shown as the mean  $\pm$  SD;  $n = 3$ .

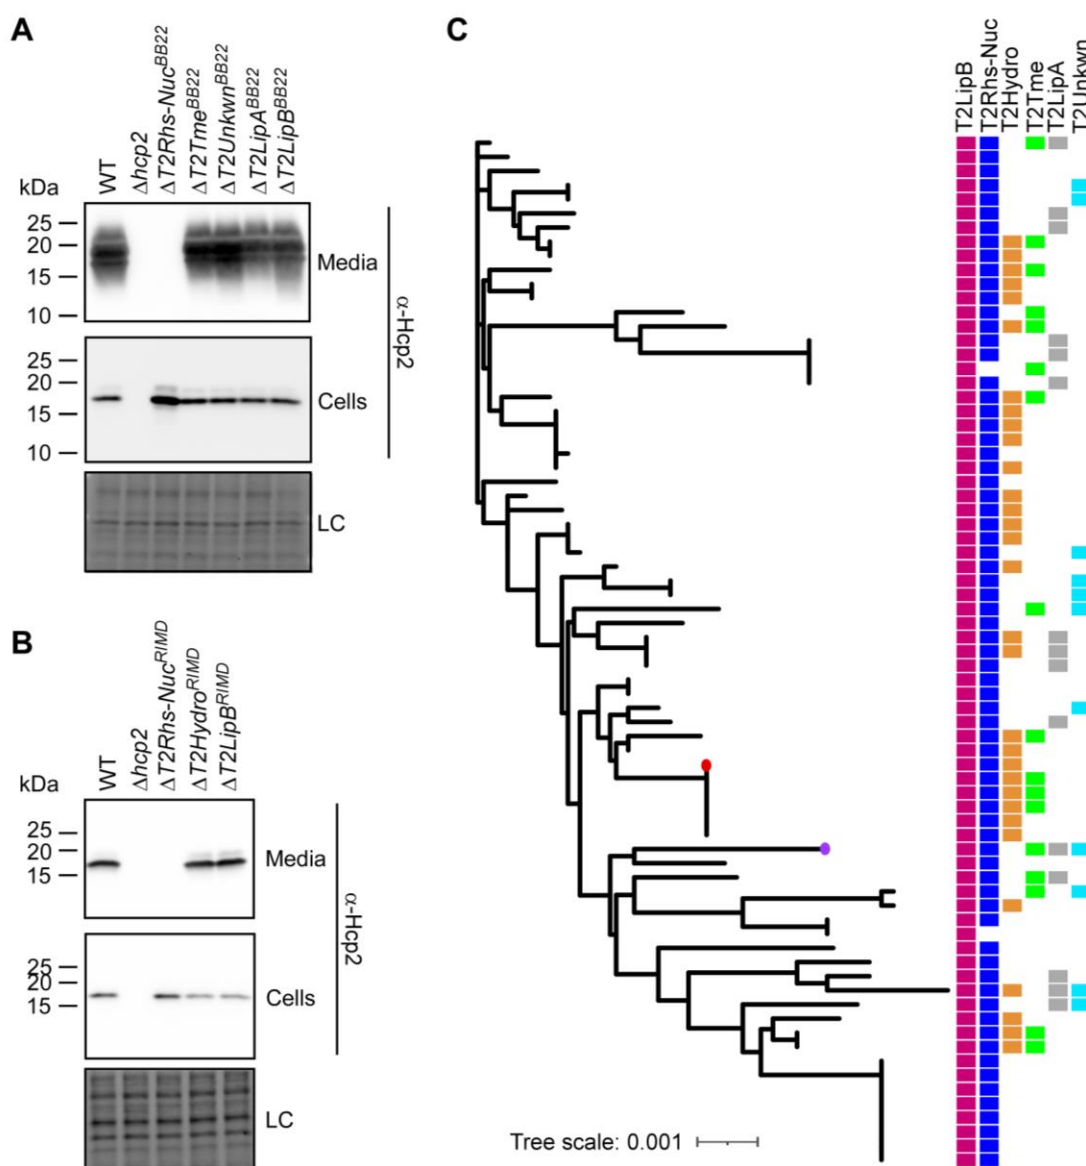

**Fig. 5. T2Rhs-Nuc is ubiquitous in *V. parahaemolyticus* genomes and is required for T6SS2 activity.** (A-B) Expression (cells) and secretion (media) of Hcp2 from *V. parahaemolyticus* BB22OP (A) and RIMD 2210633 (B) wild-type (WT) strains or their indicated derivatives containing a deletion in a gene encoding a secreted T6SS2 effector. Samples were grown in LB media at 30°C. Loading control (LC) is shown for total protein lysates. (C) Distribution of T6SS2-secreted effectors in complete *V. parahaemolyticus* genomes. The phylogenetic tree was based on DNA sequences of *rpoB* coding for DNA-directed RNA polymerase subunit beta. The evolutionary history was inferred using the neighbor-joining method. *V. parahaemolyticus* strains BB22OP and RIMD 2210633 are denoted by a circle (purple and red, respectively).

## 225 Discussion

226 In a recent report, we found that all strains of the emerging pathogen *V. parahaemolyticus* have  
227 a conserved T6SS, named T6SS2 (32), indicating that this system plays a significant role in the  
228 life cycle of this bacterium. Although this system has recently been shown to play a role in  
229 interbacterial competition (35, 36), its effector repertoire has remained unknown. In this work,  
230 we revealed the core and accessory effector repertoires of *V. parahaemolyticus* T6SS2.  
231 Notably, all of the identified effectors are encoded outside of the T6SS2 gene cluster.

232 Comparative proteomic analyses on two *V. parahaemolyticus* strains, BB22OP and RIMD  
233 2210633, revealed two proteins that were secreted by both strains: T2Rhs-Nuc and T2LipB. We  
234 found that these two proteins are encoded by nearly all *V. parahaemolyticus* strains for which a  
235 complete genome sequence is available on NCBI. Based on these findings, we propose that  
236 T2Rhs-Nuc and T2LipB constitute the conserved core of the T6SS2-secreted protein repertoire  
237 in *V. parahaemolyticus*.

238 Furthermore, we found that the conserved T2Rhs-Nuc is required for T6SS2 activity, suggesting  
239 that the loading of this effector onto the T6SS serves as a quality control checkpoint to enable  
240 T6SS2 delivery. The role of certain effectors as a structural necessity in T6SS assembly was  
241 also previously suggested by others (46–48). Donato et al. (48) demonstrated that two Rhs  
242 repeat-containing effectors in *Enterobacter cloacae* are required for T6SS-mediated secretion.  
243 Notably, in contrast to T2Rhs-Nuc, which is required for T6SS2 activity in *V. parahaemolyticus*,  
244 the two *Enterobacter* Rhs repeat-containing proteins are specialized effectors that also contain  
245 an N-terminal terminal PAAR domain, which is known to play a structural role in the secreted  
246 spike complex by capping the VgrG trimer (49).

247 Although T2LipB proteins are conserved and secreted by both *V. parahaemolyticus* strains  
248 investigated in this work, and even though T2LipB proteins and their predicted upstream-  
249 encoded proteins are homologs of the confirmed T6SS2 effector and immunity pair, T2LipA<sup>BB22-</sup>  
250 i, we were unable to determine whether T2LipB proteins function as antibacterial effectors.  
251 There are two possible explanations of why the deletion of T2LipB2 and its upstream putative  
252 immunity gene did not sensitize *V. parahaemolyticus* to attack by a parental strain: (1) T2LipB  
253 plays a different role as a secreted T6SS2 protein and it is not an antibacterial effector; (2) *V.*  
254 *parahaemolyticus* is not sensitive to intoxication by T2LipB due to the presence of a yet-to-be-  
255 identified immunity protein or because of an immunity protein-independent defense mechanism.  
256 Future work focusing on T2LipB is required to determine its role as a T6SS2-secreted protein.

257 In addition to the two conserved secreted proteins, T2Rhs-Nuc and T2LipB, we identified four  
258 effectors that were secreted by T6SS2 of either strain BB22OP or strain RIMD 2210633:  
259 T2LipA, T2Tme, T2Unkwn, and T2Hydro. Since we found that these effectors are differentially  
260 distributed among *V. parahaemolyticus* strains, we concluded that they represent at least a  
261 subset of the T6SS2 accessory effector repertoire. We hypothesize that other *V.*  
262 *parahaemolyticus* strains carry additional effectors that belong to the T6SS2 accessory effector  
263 repertoire.

264 In conclusion, we identified several effectors secreted by the conserved *V. parahaemolyticus*  
265 T6SS2, and we found that one of the conserved effectors, T2Rhs-Nuc, plays another role as a  
266 quality control checkpoint that is required for T6SS2 activity. These results confirm the predicted  
267 role of this T6SS in interbacterial competitions, and enlarge the repertoire of known T6SS  
268 effectors. We find T2Unkwn of special interest, since it does not resemble any previously  
269 described toxin; future work may reveal its mechanism of action and target.

270

## 271 **Materials and Methods**

272 **Strains and Media:** For a complete list of strains used in this study, see [Supplementary Table](#)  
273 [S1](#). *Escherichia coli* strain DH5 $\alpha$  ( $\lambda$ -*pir*) was grown in lysogeny broth (LB; containing 1% [wt/vol]  
274 NaCl) or on LB agar (1.5% [wt/vol]) plates at 37°C, or at 30°C when harboring effector  
275 expression plasmids. Media were supplemented with chloramphenicol (10  $\mu$ g/ml), kanamycin  
276 (30  $\mu$ g/ml), and gentamycin (50  $\mu$ g/ml) when needed to maintain plasmids. Glucose (0.4%  
277 [wt/vol]) was added to repress protein expression from the arabinose-inducible promoter, *Pbad*.  
278 To induce expression from *Pbad*, L-arabinose was added to the media at 0.01 or 0.1% (wt/vol),  
279 as indicated. *Vibrio parahaemolyticus* strains BB22OP, RIMD 2210633, and their derivatives, as  
280 well as *Vibrio natriegens* ATCC 14048, were grown in Marine Lysogeny Broth (MLB; LB  
281 containing 3% [wt/vol] NaCl) and on Marine Minimal Media (MMM) agar plates (1.5% [wt/vol]  
282 agar, 2% [wt/vol] NaCl, 0.4% [wt/vol] galactose, 5 mM MgSO<sub>4</sub>, 7 mM K<sub>2</sub>SO<sub>4</sub>, 77 mM K<sub>2</sub>HPO<sub>4</sub>, 35  
283 mM KH<sub>2</sub>PO<sub>4</sub>, and 2 mM NH<sub>4</sub>Cl) at 30°C. Media were supplemented with chloramphenicol (10  
284  $\mu$ g/ml), kanamycin (250  $\mu$ g/ml), or gentamycin (50  $\mu$ g/ml) to maintain plasmids. To induce  
285 expression from *Pbad*, L-arabinose was added to the media at 0.01 or 0.1% (wt/vol), as  
286 indicated.

287

288 **Plasmid construction:** For a complete list of plasmids used in this study, see [Supplementary](#)  
289 [Table S2](#). For expression in bacteria, the coding sequences (CDS) of the genes of interest were  
290 PCR amplified from the respective genomic DNA of the encoding bacterium. Next, amplicons  
291 were inserted into the multiple cloning site (MCS) of pBAD<sup>K</sup>/Myc-His, pBAD33.1<sup>F</sup> or their  
292 derivatives using the Gibson assembly method (50). Plasmids were introduced into *E. coli* DH5 $\alpha$   
293 ( $\lambda$ -*pir*) by electroporation, and into vibrios via conjugation. Transconjugants were selected on  
294 MMM agar plates supplemented with the appropriate antibiotics to select clones containing the  
295 desired plasmids.

296

297 **Construction of deletion strains:** The construction of in-frame deletions in *V.*  
298 *parahaemolyticus* strains was described previously (21, 34). Briefly, 1 kb sequences upstream  
299 and downstream of each gene or operon to be deleted were cloned into pDM4, a Cm<sup>R</sup> OriR6K  
300 suicide plasmid. The pDM4 constructs were transformed into *E. coli* DH5 $\alpha$  ( $\lambda$ -*pir*) by  
301 electroporation, and then transferred into vibrios via conjugation. Transconjugants were  
302 selected on MMM agar plates supplemented with chloramphenicol, and then counter-selected  
303 on MMM agar plates containing 15% (wt/vol) sucrose for loss of the *sacB*-containing plasmid.  
304 Deletions were further confirmed by PCR.

305

306 **Bacterial competition assays:** Bacterial competition assays were performed as previously  
307 described (21), with minor modifications. Briefly, cultures of the indicated attacker and prey  
308 strains were grown overnight. Bacterial cultures were then normalized to OD<sub>600</sub> = 0.5 and mixed  
309 at a 10:1 (attacker:prey) ratio in triplicate. Next, the mixtures were spotted (25  $\mu$ l) on LB or MLB  
310 agar plates supplemented with 0.01 or 0.1% (wt/vol) L-arabinose, as indicated, and incubated  
311 for 4 h at 30°C. The colony-forming units (CFU) of the prey strains were determined at the 0 and  
312 4 h time points by counting 10-fold serial dilutions plated on MMM agar plates, supplemented  
313 with an appropriate antibiotic to select for prey colony growth. The experiments were performed  
314 at least three times with similar results. Results from a representative experiment are shown.

315

316 **Hcp2 secretion assays:** Hcp2 secretion assays were performed as previously described (21),  
317 with minor modifications. Briefly, *Vibrio* strains were grown overnight in MLB broth  
318 supplemented with antibiotics to maintain plasmids when needed. Bacterial cultures were then  
319 normalized to an OD<sub>600</sub> of 0.18 (BB22OP) or 0.9 (RIMD 2210633) in 5 ml LB broth  
320 supplemented with appropriate antibiotics and 0.1% (wt/vol) L-arabinose when expression from  
321 an arabinose-inducible plasmid was required. Bacterial cultures were incubated with constant  
322 shaking (220 rpm) at 30°C for 5 h. For expression fractions (cells), cells equivalent to 1  
323 OD<sub>600</sub> units were collected, and cell pellets were resuspended in 100 µl of 2x Tris-glycine SDS  
324 sample buffer (Novex, Life Sciences). For secretion fractions (media), supernatant volumes  
325 equivalent to 10 OD<sub>600</sub> units were filtered (0.22 µm), and proteins were precipitated using the  
326 deoxycholate and trichloroacetic acid method (51). The precipitated proteins were washed twice  
327 with cold acetone, and then air-dried before resuspension in 20 µl of 100 mM Tris-Cl (pH = 8.0)  
328 and 20 µl of 2X protein sample buffer. Next, samples were incubated at 95°C for 5 or 10 min  
329 and then resolved on TGX Stain-free gel (Bio-Rad). The proteins were transferred onto 0.2 µm  
330 nitrocellulose membranes using Trans-Blot Turbo Transfer (Bio-Rad) according to the  
331 manufacturer's protocol. Membranes were then immunoblotted with custom-made α-Hcp2  
332 (52) or α-Myc (Santa Cruz Biotechnologies, sc-40) antibodies at 1:1000 dilution. Protein signals  
333 were visualized in a Fusion FX6 imaging system (Vilber Lourmat) using enhanced  
334 chemiluminescence (ECL) reagents. The experiments were performed at least three times with  
335 similar results. Results from a representative experiment are shown.

336

### 337 **Mass spectrometry analyses:**

338 Sample preparation for mass spectrometry was performed as described in the "Hcp2 secretion  
339 assays" section, with minor modifications (*V. parahaemolyticus* BB22OP strains were grown in  
340 MLB media, and *V. parahaemolyticus* RIMD2210633 strains were grown in LB media). After the  
341 acetone wash step, samples were shipped to the Smoler Proteomics Center at the Technion for  
342 analysis.

343 Precipitated proteins were washed 3 times in cold 80% (v/v) acetone and incubated for 15 min  
344 at -20°C, followed by centrifugation at 16,000 x g for 10 min at 4°C. The protein pellets were  
345 then resuspended and incubated at 60°C for 30 min in reducing urea buffer (8 M urea, 100 mM  
346 ammonium bicarbonate, and 3 mM DTT for BB22OP samples; 9 M urea, 400 mM ammonium  
347 bicarbonate, and 10 mM DTT for RIMD 221063 samples). The proteins were then modified with  
348 iodoacetamide (45 and 35 mM for the RIMD 2210633 and BB22OP samples, respectively) in  
349 100 mM ammonium bicarbonate for 30 min at room temperature in the dark. Then, 10 µg of  
350 protein were digested overnight at 37°C in 2 or 1.5 M urea (for BB22OP and RIMD 221063  
351 samples, respectively) and 25 mM ammonium bicarbonate with modified trypsin (Promega), in a  
352 1:50 (M/M) enzyme-to-substrate ratio. For the RIMD 221063 samples, an additional  
353 trypsinization step was performed for 4 h. The tryptic peptides were acidified by adding 1%  
354 formic acid and desalted using C18 tips (homemade stage tips), then dried and re-suspended in  
355 0.1% Formic acid. The resulting tryptic peptides were resolved by reverse-phase  
356 chromatography on 0.075 X 250-mm or 0.075 X 300-mm (for BB22OP and RIMD 2210633  
357 samples, respectively) fused silica capillaries (J&W) packed with Reprosil reversed phase  
358 material (Dr Maisch GmbH, Germany). The peptides were eluted with a linear 60 min gradient of  
359 5 to 28%, 15 min gradient of 28 to 95%, and 15 min at 95% acetonitrile with 0.1% formic acid in  
360 water at a flow rate of 0.15 µl/min. Mass spectrometry was performed using a Q Exactive plus  
361 mass spectrometer (Thermo) in a positive mode using a repetitively full MS scan followed by  
362 high collision dissociation (HCD) of the 10 most dominant ions selected from the first MS scan.

363 The mass spectrometry data were analyzed using MaxQuant software 1.5.2.8 for peak picking  
364 and identification using the Andromeda search engine (53) against the relevant *V.*  
365 *parahaemolyticus* strain from the Uniprot database with mass tolerance of 6 ppm for the  
366 precursor masses and 20 ppm for the fragment ions. For the BB22OP samples, oxidation on  
367 methionine was accepted as variable modifications, and carbamidomethyl on cysteine was  
368 accepted as static modifications. The minimal peptide length was set to six amino acids; a  
369 maximum of two miscleavages was allowed. For the RIMD 2210633 samples, oxidation on  
370 methionine and protein N-terminus acetylation were accepted as variable modifications, and  
371 carbamidomethyl on cysteine was accepted as static modifications. The minimal peptide length  
372 was set to 7 amino acids; a maximum of two miscleavages was allowed. For the BB22OP  
373 samples, the minimum number of samples identified per protein was set to 2. Peptide-level and  
374 protein-level false discovery rates (FDRs) were filtered to 1% using the target-decoy strategy.  
375 Protein tables were filtered to eliminate the identifications from the reverse database and  
376 common contaminants and single peptide identifications. The data were quantified by label-free  
377 analysis using the same software, based on extracted ion currents (XICs) of peptides enabling  
378 quantitation from each LC/MS run for each peptide identified in any of the samples. Statistical  
379 analysis of the identification and quantization results was done using Perseus 1.6.7.0 software  
380 (54). Intensity data were transformed to log<sub>2</sub>. Missing values were replaced with 18 (on the  
381 logarithmic scale), which corresponds to the lowest intensity that was detected. A Student's *t*-  
382 test with Permutation-based FDR (with 250 randomization, threshold value = 0.05) was  
383 performed.

384 The mass spectrometry proteomics data have been deposited in the ProteomeXchange  
385 Consortium via the PRIDE (55) partner repository with the dataset identifiers PXD037864 for  
386 strain BB22OP, and PXD037980 for strain RIMD 2210633.

387

388 **Identifying effector homologs in *V. parahaemolyticus* genomes:** A local database  
389 containing the RefSeq bacterial nucleotide and protein sequences was generated (last updated  
390 on June 11, 2022). BLASTP was employed to identify homologs of the T6SS2 effectors in *V.*  
391 *parahaemolyticus* complete genomes. The amino acid sequences of T2Rhs-Nuc<sup>RIMD</sup>  
392 (WP\_005479434.1), T2Hydro<sup>RIMD</sup> (BAC61690.1, amino acids 65-467), T2LipA<sup>BB22</sup>  
393 (WP\_015313641.1), T2Tme<sup>BB22</sup> (WP\_015296823.1), T2Unkwn<sup>BB22</sup> (WP\_015313171.1), and  
394 T2LipB<sup>BB22</sup> (WP\_015296300.1) were used as queries. The E-value threshold was set to 10<sup>-12</sup>  
395 and the coverage was set to 70%, based on the length of the query sequences.

396

397 **Constructing a phylogenetic tree:** The nucleotide sequences of *rpoB* were retrieved from the  
398 local RefSeq database (partial and pseudogene sequences were removed). Phylogenetic  
399 analyses of bacterial genomes were conducted using the MAFFT 7 server  
400 ([mafft.cbrc.jp/alignment/server/](http://mafft.cbrc.jp/alignment/server/)). Multiple sequence alignment was generated using MAFFT v7  
401 FFT-NS-i (56, 57). The evolutionary history of *V. parahaemolyticus* genomes was inferred using  
402 the neighbor-joining method (58) with the Jukes-Cantor substitution model (JC69). The analysis  
403 included 73 nucleotide sequences and 4,029 conserved sites.

404

## 405 **Data Availability Statement**

406 The authors confirm that the data supporting the findings of this study are available within the  
407 article and its supplementary material. The mass spectrometry raw data files were deposited in  
408 ProteomeXchange under the accession numbers indicated in the Materials and Methods  
409 section.

410

## 411 **Acknowledgments**

412 This project received funding from the Israel Science Foundation (grant no. 920/17 to D. Salomon,  
413 and grant no. 1362/21 to D. Salomon and E. Bosis). We thank members of the Salomon and  
414 Bosis labs for helpful discussions and suggestions. We also thank the Smoler Proteomics Center  
415 at the Technion for performing and analyzing the mass spectrometry data. This work was  
416 performed in partial fulfillment of the requirements for a PhD degree for D. Tchelet at the Sackler  
417 Faculty of Medicine, Tel Aviv University.

418

## 419 **Author Contributions**

420 D. Tchelet: conceptualization, investigation, methodology, and writing—original draft.

421 K. Keppel: investigation and methodology.

422 E. Bosis: conceptualization, investigation, methodology, funding acquisition, and writing—  
423 original draft.

424 D. Salomon: conceptualization, supervision, funding acquisition, investigation, methodology,  
425 and writing—original draft.

426

## 427 **Conflict of Interest**

428 The authors declare that they have no conflict of interest.

429

## 430 **References**

- 431 1. Grimes DJ. 2020. The Vibrios: Scavengers, Symbionts, and Pathogens from the  
432 Sea. *Microb Ecol* 2020 803 80:501–506.
- 433 2. Newton A, Kendall M, Vugia DJ, Henao OL, Mahon BE. 2012. Increasing Rates of  
434 Vibriosis in the United States, 1996–2010: Review of Surveillance Data From 2  
435 Systems. *Clin Infect Dis* 54:S391–S395.
- 436 3. Baker-Austin C, Oliver JD, Alam M, Ali A, Waldor MK, Qadri F, Martinez-Urtaza J.  
437 2018. *Vibrio* spp. infections. *Nat Rev Dis Prim* 4:1–19.
- 438 4. Ina-Salwany MY, Al-saari N, Mohamad A, Mursidi F, Mohd-Aris A, Amal MNA,  
439 Kasai H, Mino S, Sawabe T, Zamri-Saad M. 2019. Vibriosis in Fish: A Review on  
440 Disease Development and Prevention. *J Aquat Anim Health* 31:3–22.
- 441 5. Sun Y, Bernardy EE, Hammer BK, Miyashiro T. 2013. Competence and natural  
442 transformation in vibrios. *Mol Microbiol*. NIH Public Access  
443 <https://doi.org/10.1111/mmi.12307>.
- 444 6. Le Roux F, Blokesch M. 2018. Eco-evolutionary dynamics linked to horizontal  
445 gene transfer in vibrios. *Annu Rev Microbiol* 72:annurev-micro-090817-062148.
- 446 7. Speare L, Cecere AG, Guckes KR, Smith S, Wollenberg MS, Mandel MJ,  
447 Miyashiro T, Septer AN. 2018. Bacterial symbionts use a type VI secretion system



- 448 to eliminate competitors in their natural host. *Proc Natl Acad Sci U S A*  
449 115:E8528–E8537.
- 450 8. Wang W, Tang K, Wang P, Zeng Z, Xu T, Zhan W, Liu T, Wang Y, Wang X. 2022.  
451 The coral pathogen *Vibrio coralliilyticus* kills non-pathogenic holobiont competitors  
452 by triggering prophage induction. *Nat Ecol Evol* 2022 6:1132–1144.
- 453 9. Van Der Henst C, Scignari T, Maclachlan C, Blokesch M. 2015. An intracellular  
454 replication niche for *Vibrio cholerae* in the amoeba *Acanthamoeba castellanii*.  
455 *ISME J* 2016 104 10:897–910.
- 456 10. Chavez-Dozal A, Gorman C, Erken M, Steinberg PD, McDougald D, Nishiguchi  
457 MK. 2013. Predation response of *Vibrio fischeri* biofilms to bacterivorous protists.  
458 *Appl Environ Microbiol* 79:553–558.
- 459 11. Matz C, Nouri B, McCarter L, Martinez-Urtaza J. 2011. Acquired Type III  
460 Secretion System Determines Environmental Fitness of Epidemic *Vibrio*  
461 *parahaemolyticus* in the Interaction with Bacterivorous Protists. *PLoS One*  
462 6:e20275.
- 463 12. Dar Y, Salomon D, Bosis E. 2018. The antibacterial and anti-eukaryotic Type VI  
464 secretion system MIX-effector repertoire in Vibrionaceae. *Mar Drugs* 16:433.
- 465 13. Pukatzki S, Ma AT, Sturtevant D, Krastins B, Sarracino D, Nelson WC, Heidelberg  
466 JF, Mekalanos JJ. 2006. Identification of a conserved bacterial protein secretion  
467 system in *Vibrio cholerae* using the *Dictyostelium* host model system. *Proc Natl*  
468 *Acad Sci* 103:1528–1533.
- 469 14. Hood RD, Singh P, Hsu FS, Güvener T, Carl MA, Trinidad RRS, Silverman JM,  
470 Ohlson BB, Hicks KG, Plemel RL, Li M, Schwarz S, Wang WY, Merz AJ, Goodlett  
471 DR, Mougous JD. 2010. A type VI secretion system of *Pseudomonas aeruginosa*  
472 targets a toxin to bacteria. *Cell Host Microbe* 7:25–37.
- 473 15. Basler M, Pilhofer M, Henderson GP, Jensen GJ, Mekalanos JJ. 2012. Type VI  
474 secretion requires a dynamic contractile phage tail-like structure. *Nature* 483:182–  
475 6.
- 476 16. Cherrak Y, Flaugnatti N, Durand E, Journet L, Cascales E. 2019. Structure and  
477 Activity of the Type VI Secretion System. *Microbiol Spectr* 7.
- 478 17. Jana B, Salomon D. 2019. Type VI secretion system: a modular toolkit for  
479 bacterial dominance. *Future Microbiol* 14:fmb-2019-0194.
- 480 18. Manera K, Kamal F, Burkinshaw B, Dong TG. 2021. Essential functions of  
481 chaperones and adaptors of protein secretion systems in Gram-negative bacteria.  
482 *FEBS J* <https://doi.org/10.1111/FEBS.16056>.
- 483 19. Kanarek K, Fridman CM, Bosis E, Salomon D. 2022. A new class of polymorphic  
484 T6SS effectors and tethers. *bioRxiv* <https://doi.org/10.1101/2022.10.27.514009>.
- 485 20. Dar Y, Jana B, Bosis E, Salomon D. 2022. A binary effector module secreted by a  
486 type VI secretion system. *EMBO Rep* 23:e53981.
- 487 21. Salomon D, Gonzalez H, Updegraff BL, Orth K. 2013. *Vibrio parahaemolyticus*

- 488 Type VI secretion system 1 is activated in marine conditions to target bacteria,  
489 and is differentially regulated from system 2. *PLoS One* 8:e61086.
- 490 22. Salomon D, Klimko JA, Trudgian DC, Kinch LN, Grishin N V., Mirzaei H, Orth K.  
491 2015. Type VI secretion system toxins horizontally shared between marine  
492 bacteria. *PLoS Pathog* 11:1–20.
- 493 23. Ray A, Schwartz N, Souza Santos M, Zhang J, Orth K, Salomon D, de Souza  
494 Santos M, Zhang J, Orth K, Salomon D. 2017. Type VI secretion system MIX-  
495 effectors carry both antibacterial and anti-eukaryotic activities. *EMBO Rep*  
496 18:e201744226.
- 497 24. Guillemette R, Ushijima B, Jalan M, Häse CC, Azam F. 2020. Insight into the  
498 resilience and susceptibility of marine bacteria to T6SS attack by *Vibrio cholerae*  
499 and *Vibrio coralliilyticus*. *PLoS One* 15.
- 500 25. Cohen H, Baram N, Fridman CM, Edry-Botzer L, Salomon D, Gerlic M. 2022.  
501 Post-phagocytosis activation of NLRP3 inflammasome by two novel T6SS  
502 effectors. *Elife* 11:e82766.
- 503 26. Piel D, Bruto M, James A, Labreuche Y, Lambert C, Janicot A, Chenivresse S,  
504 Petton B, Wegner KM, Stoudmann C, Blokesch M, Le Roux F. 2020. Selection of  
505 *Vibrio crassostreae* relies on a plasmid expressing a type 6 secretion system  
506 cytotoxic for host immune cells. *Environ Microbiol* 22.
- 507 27. Russell AB, Singh P, Brittnacher M, Bui NK, Hood RD, Carl MA, Agnello DM,  
508 Schwarz S, Goodlett DR, Vollmer W, Mougous JD. 2012. A widespread bacterial  
509 type VI secretion effector superfamily identified using a heuristic approach. *Cell*  
510 *Host Microbe* 11:538–549.
- 511 28. Tran L, Nunan L, Redman R, Mohny L, Pantoja C, Fitzsimmons K, Lightner D.  
512 2013. Determination of the infectious nature of the agent of acute  
513 hepatopancreatic necrosis syndrome affecting penaeid shrimp. *Dis Aquat Organ*  
514 105:45–55.
- 515 29. Ritchie JM, Rui H, Zhou X, Iida T, Kodoma T, Ito S, Davis BM, Bronson RT,  
516 Waldor MK. 2012. Inflammation and Disintegration of Intestinal Villi in an  
517 Experimental Model for *Vibrio parahaemolyticus*-Induced Diarrhea. *PLoS Pathog*  
518 8:e1002593.
- 519 30. Yang H, Santos M de S, Lee J, Law HT, Chimalapati S, Verdu EF, Vallance BA,  
520 Orth K. 2019. A novel mouse model of enteric *vibrio parahaemolyticus* infection  
521 reveals that the type iii secretion system 2 effector vopc plays a key role in tissue  
522 invasion and gastroenteritis. *MBio* 10.
- 523 31. Lee C-T, Chen I-T, Yang Y-T, Ko T-P, Huang Y-T, Huang J-Y, Huang M-F, Lin S-  
524 J, Chen C-Y, Lin S-S, Lightner D V., Wang H-C, Wang AH-J, Wang H-C, Hor L-I,  
525 Lo C-F. 2015. The opportunistic marine pathogen *Vibrio parahaemolyticus*  
526 becomes virulent by acquiring a plasmid that expresses a deadly toxin. *Proc Natl*  
527 *Acad Sci* 112:10798–10803.
- 528 32. Jana B, Keppel K, Fridman CM, Bosis E, Salomon D. 2022. Multiple T6SSs,  
529 mobile auxiliary modules, and effectors revealed in a systematic analysis of the

- 530 *Vibrio parahaemolyticus* pan-genome. mSystems e00723-22.
- 531 33. Salomon D, Kinch LN, Trudgian DC, Guo X, Klimko JA, Grishin N V., Mirzaei H,  
532 Orth K. 2014. Marker for type VI secretion system effectors. Proc Natl Acad Sci  
533 111:9271–9276.
- 534 34. Jana B, Fridman CM, Bosis E, Salomon D. 2019. A modular effector with a  
535 DNase domain and a marker for T6SS substrates. Nat Commun 10:3595.
- 536 35. Fridman CM, Keppel K, Gerlic M, Bosis E, Salomon D. 2020. A comparative  
537 genomics methodology reveals a widespread family of membrane-disrupting  
538 T6SS effectors. Nat Commun 11:1085.
- 539 36. Metzger LC, Matthey N, Stoudmann C, Collas EJ, Blokesch M. 2019. Ecological  
540 implications of gene regulation by TfoX and TfoY among diverse *Vibrio* species.  
541 Environ Microbiol 21:2231–2247.
- 542 37. Makino K, Oshima K, Kurokawa K, Yokoyama K, Uda T, Tagomori K, Iijima Y,  
543 Najima M, Nakano M, Yamashita A, Kubota Y, Kimura S, Yasunaga T, Honda T,  
544 Shinagawa H, Hattori M, Iida T. 2003. Genome sequence of *Vibrio*  
545 *parahaemolyticus*: a pathogenic mechanism distinct from that of *V. cholerae*.  
546 Lancet 361:743–749.
- 547 38. Jensen R V, Depasquale SM, Harbolick EA, Hong T, Kernell AL, Kruchko DH,  
548 Modise T, Smith CE, McCarter LL, Stevens AM. 2013. Complete Genome  
549 Sequence of Prepandemic *Vibrio parahaemolyticus* BB22OP. Genome Announc  
550 1.
- 551 39. Koskiniemi S, Lamoureux JG, Nikolakakis KC, t’Kint de Roodenbeke C, Kaplan  
552 MD, Low DA, Hayes CS. 2013. Rhs proteins from diverse bacteria mediate  
553 intercellular competition. Proc Natl Acad Sci U S A 110:7032–7.
- 554 40. Camacho C, Coulouris G, Avagyan V, Ma N, Papadopoulos J, Bealer K, Madden  
555 TL. 2009. BLAST+: Architecture and applications. BMC Bioinformatics 10.
- 556 41. Zimmermann L, Stephens A, Nam S-Z, Rau D, Kübler J, Lozajic M, Gabler F,  
557 Söding J, Lupas AN, Alva V. 2018. A completely reimplemented MPI  
558 bioinformatics toolkit with a new HHpred server at its core. J Mol Biol 430:2237–  
559 2243.
- 560 42. Varadi M, Anyango S, Deshpande M, Nair S, Natassia C, Yordanova G, Yuan D,  
561 Stroe O, Wood G, Laydon A, Židek A, Green T, Tunyasuvunakool K, Petersen S,  
562 Jumper J, Clancy E, Green R, Vora A, Lutfi M, Figurnov M, Cowie A, Hobbs N,  
563 Kohli P, Kleywegt G, Birney E, Hassabis D, Velankar S. 2022. AlphaFold Protein  
564 Structure Database: Massively expanding the structural coverage of protein-  
565 sequence space with high-accuracy models. Nucleic Acids Res 50.
- 566 43. Jumper J, Evans R, Pritzel A, Green T, Figurnov M, Ronneberger O,  
567 Tunyasuvunakool K, Bates R, Židek A, Potapenko A, Bridgland A, Meyer C, Kohl  
568 SAA, Ballard AJ, Cowie A, Romera-Paredes B, Nikolov S, Jain R, Adler J, Back T,  
569 Petersen S, Reiman D, Clancy E, Zielinski M, Steinegger M, Pacholska M,  
570 Berghammer T, Bodenstein S, Silver D, Vinyals O, Senior AW, Kavukcuoglu K,  
571 Kohli P, Hassabis D. 2021. Highly accurate protein structure prediction with

- 572 AlphaFold. *Nat* 2021 5967873 596:583–589.
- 573 44. Holm L. 2022. Dali server: structural unification of protein families. *Nucleic Acids*  
574 *Res* 50:W210–W215.
- 575 45. Hyatt D, Chen G-L, Locascio PF, Land ML, Larimer FW, Hauser LJ. 2010.  
576 Prodigal: prokaryotic gene recognition and translation initiation site identification.  
577 *BMC Bioinformatics* 11:119.
- 578 46. Liang X, Pei TT, Li H, Zheng HY, Luo H, Cui Y, Tang MX, Zhao YJ, Xu P, Dong T.  
579 2021. VgrG-dependent effectors and chaperones modulate the assembly of the  
580 type VI secretion system. *PLoS Pathog* 17:e1010116.
- 581 47. Wu C, Lien Y, Bondage D, Lin J, Pilhofer M, Shih Y, Chang JH, Lai E. 2020.  
582 Effector loading onto the VgrG carrier activates type VI secretion system  
583 assembly. *EMBO Rep* 21.
- 584 48. Donato SL, Beck CM, Garza-Sánchez F, Jensen SJ, Ruhe ZC, Cunningham DA,  
585 Singleton I, Low DA, Hayes CS. 2020. The  $\beta$ -encapsulation cage of  
586 rearrangement hotspot (Rhs) effectors is required for type VI secretion. *Proc Natl*  
587 *Acad Sci U S A* 117.
- 588 49. Shneider MM, Buth SA, Ho BT, Basler M, Mekalanos JJ, Leiman PG. 2013.  
589 PAAR-repeat proteins sharpen and diversify the type VI secretion system spike.  
590 *Nature* 500:350–353.
- 591 50. Gibson DG, Young L, Chuang RY, Venter JC, Hutchison CA, Smith HO. 2009.  
592 Enzymatic assembly of DNA molecules up to several hundred kilobases. *Nat*  
593 *Methods* 6:343–345.
- 594 51. Bensadoun A, Weinstein D. 1976. Assay of proteins in the presence of interfering  
595 materials. *Anal Biochem* 70:241–250.
- 596 52. Li P, Kinch LN, Ray A, Dalia AB, Cong Q, Nunan LM, Camilli A, Grishin N V,  
597 Salomon D, Orth K. 2017. Acute hepatopancreatic necrosis disease-causing  
598 *Vibrio parahaemolyticus* strains maintain an antibacterial type VI secretion system  
599 with versatile effector repertoires. *Appl Environ Microbiol* 83:e00737-17.
- 600 53. Cox J, Hein MY, Luber CA, Paron I, Nagaraj N, Mann M. 2014. Accurate  
601 proteome-wide label-free quantification by delayed normalization and maximal  
602 peptide ratio extraction, termed MaxLFQ. *Mol Cell Proteomics* 13.
- 603 54. Tyanova S, Temu T, Sinitcyn P, Carlson A, Hein MY, Geiger T, Mann M, Cox J.  
604 2016. The Perseus computational platform for comprehensive analysis of  
605 (prote)omics data. *Nat Methods* <https://doi.org/10.1038/nmeth.3901>.
- 606 55. Perez-Riverol Y, Bai J, Bandla C, García-Seisdedos D, Hewapathirana S,  
607 Kamatchinathan S, Kundu DJ, Prakash A, Frericks-Zipper A, Eisenacher M,  
608 Walzer M, Wang S, Brazma A, Vizcaino JA. 2022. The PRIDE database  
609 resources in 2022: A hub for mass spectrometry-based proteomics evidences.  
610 *Nucleic Acids Res* 50.
- 611 56. Katoh K, Misawa K, Kuma K, Miyata T. 2002. MAFFT: a novel method for rapid  
612 multiple sequence alignment based on fast Fourier transform. *Nucleic Acids Res*

613 30:3059–66.

614 57. Katoh K, Rozewicki J, Yamada KD. 2018. MAFFT online service: Multiple  
615 sequence alignment, interactive sequence choice and visualization. *Brief*  
616 *Bioinform* 20:1160–1166.

617 58. Saitou N, Nei M. 1987. The neighbor-joining method: a new method for  
618 reconstructing phylogenetic trees. *Mol Biol Evol* 4:406–425.

619
